# Supplementary material
Source: Springer Nature journal article supplement (https://www.springermedizin.de/resource/supplementary/12884_2012_564_MOESM6_ESM.pdf/9458064)
Supplement: MOESM6 [file 9458064]

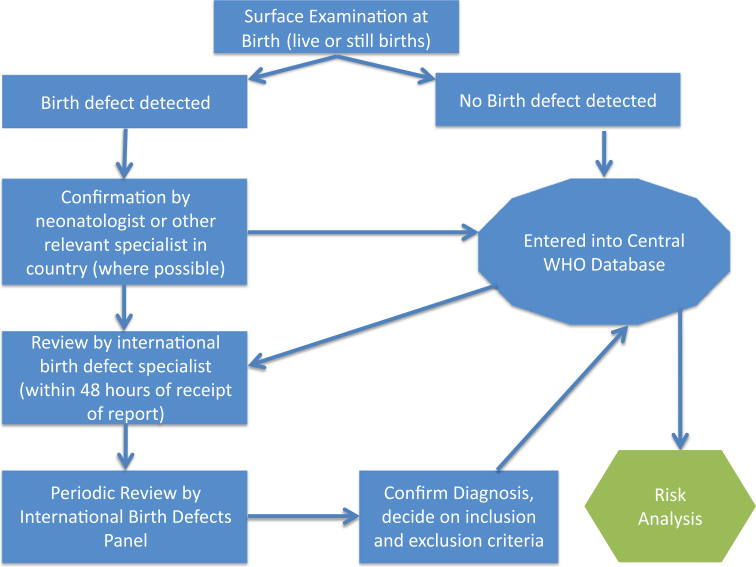

Surface Examination at Birth (live or still births)

Birth defect detected

No Birth defect detected

Confirmation by neonatologist or other relevant specialist in country (where possible)

Entered into Central WHO Database

Review by international birth defect specialist (within 48 hours of receipt of report)

Periodic Review by International Birth Defects Panel

Confirm Diagnosis, decide on inclusion and exclusion criteria

Risk Analysis
